# Supplementary material for: The Impact of Geographical Variation in Plasmodium knowlesi Apical Membrane Protein 1 (PkAMA-1) on Invasion Dynamics of P. knowlesi
Source: MDPI journal article supplement (doi:10.3390/tropicalmed8010056), 2023-01-10
Supplement: s1 [file s1]

## Supplementary Material

**Table S1.** Information on biological materials, chemicals, softwares and services used in this study.

| Reagent/Resource                                                       | Reference or source                                                          | Identifier/ Catalog Number / Notes            |
|------------------------------------------------------------------------|------------------------------------------------------------------------------|-----------------------------------------------|
| <b>Biological materials</b>                                            |                                                                              |                                               |
| A1-H.1 ( <i>Plasmodium knowlesi</i> )                                  | Laboratory-adapted parasite strain; maintained in Universiti Malaya lab. [3] | Used for merozoite invasion inhibition assay. |
| <b>Antibodies</b>                                                      |                                                                              |                                               |
| Biotin-labelled Goat Anti-mouse Antibodies                             | KPL Inc., USA                                                                | Cat. No. 16-18-06                             |
| His-Tag Monoclonal Antibody                                            | Merck KGaA., Germany                                                         | Cat. No. 70796-M                              |
| <b>Chemicals, Enzymes and other reagents</b>                           |                                                                              |                                               |
| 30% Acrylamide/Bis Solution                                            | Bio-Rad, USA                                                                 | Cat. No. 161-0156                             |
| 5-bromo-4-chloro-3-indolyl phosphate/nitro blue tetrazolium (BCIP/NBT) | Sigma, USA                                                                   | Cat. No. B5655                                |
| 5X Green GoTaq® Flexi Buffer                                           | Promega, Madison, Wisconsin, USA                                             | Cat. No. M891A                                |
| Agarose                                                                | EURx Ltd., Gdansk, Poland                                                    | Cat. No. E0301-500                            |
| AlbuMAX IITM                                                           | Gibco, USA                                                                   | Cat. No. 11021-045                            |
| Alkaline Phosphatase Labeled Streptavidin                              | KPL Inc., USA                                                                | Cat. No. 475-3000                             |
| BamHI Restriction Enzyme                                               | New England Biolabs, USA                                                     | Cat. No. R0136T                               |
| Bovine Serum Albumin (BSA)                                             | Sigma, USA                                                                   | Cat. No. A9418                                |
| Chloramphenicol                                                        | Sigma, USA                                                                   | Cat. No. C0378                                |
| Complete Freund's Adjuvant                                             | Sigma, USA                                                                   | Cat. No. F5881                                |
| Coomassie Blue Stain                                                   | Serva, Germany                                                               | Cat. No. 17524                                |
| D-glucose                                                              | Sigma, USA                                                                   | Cat. No. G7520                                |
| DNeasy® Blood & Tissue Kit                                             | Qiagen, Hilden, Germany                                                      | Cat. No. 69506                                |
| dNTP Mix                                                               | Promega, Madison, Wisconsin, USA                                             | Cat. No. U1511                                |
| Giemsa                                                                 | Merck, USA                                                                   | Cat. No. HX87730704                           |
| Histodenz                                                              | Sigma, USA                                                                   | Cat. No. D2158                                |
| Horse Serum                                                            | Gibco, USA                                                                   | Cat. No. 16050122                             |
| Imidazole                                                              | Sigma, USA                                                                   | Cat. No. I202                                 |
| Incomplete Freund's Adjuvant                                           | Sigma, USA                                                                   | Cat. No. F5506                                |
| Isopropyl β-D-1-thiogalactopyranoside (IPTG)                           | Molekula, France                                                             | Cat. No. 367-93-1                             |
| Kanamycin Sulfate                                                      | Sigma, USA                                                                   | Cat. No. K1377                                |
| Methanol                                                               | J.T.Baker                                                                    | Cat. No. 9070-68                              |
| MgCl <sub>2</sub> , 25mM                                               | Promega, Madison, Wisconsin, USA                                             | Cat. No. A351H                                |

|                                                                                             |                                                               |                                                            |
|---------------------------------------------------------------------------------------------|---------------------------------------------------------------|------------------------------------------------------------|
| Nickel-NTA Agarose Resins                                                                   | Qiagen, Hilden, Germany                                       | Cat. No. 30230                                             |
| One Shot® Top 10 F'                                                                         | Invitrogen, USA                                               | Cat. No. C3030-05                                          |
| PageRuler™ Prestained Protein Ladder, 10 to 180 kDa                                         | Thermo Scientific, USA                                        | Cat. No. 26616                                             |
| pGEM®-T Vector System 1                                                                     | Promega, Madison, Wisconsin, USA                              | Cat. No. A3600                                             |
| Phosphate Buffer Saline (PBS)                                                               | Solarbio, China                                               | Cat. No. P1000                                             |
| QIAprep® Spin Miniprep Kit                                                                  | Qiagen, Hilden, Germany                                       | Cat. No. 27106                                             |
| Quick Start™ Bovine Serum Albumin (BSA) Standard Set                                        | Bio-Rad, USA                                                  | Cat. No. 500-0207                                          |
| Roswell Park Memorial Institute (RPMI) 1640 medium                                          | Gibco, USA                                                    | Cat. No. 23400-013                                         |
| Sodium Bicarbonate                                                                          | Sigma, USA                                                    | Cat. No. S5761                                             |
| Sodium Dodecyl Sulfate (SDS)                                                                | Amresco, USA                                                  | Cat. No. 0227                                              |
| SYBR® Safe DNA gel stain                                                                    | Invitrogen, Eugene, USA                                       | Cat. No. S33102                                            |
| T7 Express <i>lysY/I</i> <sup>q</sup>                                                       | New England Biolabs, Inc., USA                                | Cat. No. C30131                                            |
| T7 Promoter-based pET-30a(+)                                                                | Merck Millipore, USA                                          | Cat. No. 70781-3                                           |
| Tween-20                                                                                    | Promega, Madison, Wisconsin, USA                              | Cat. No. H5152                                             |
| Urea                                                                                        | Sigma, USA                                                    | Cat. No. U5378                                             |
| <b>Software</b>                                                                             |                                                               |                                                            |
| BioEdit Sequence Alignment Editor Version 7.2.0                                             | BioEdit                                                       | Used for the nucleotide and amino acid sequences alignment |
| GraphPad Prism Version 9.0                                                                  | GraphPad                                                      | Used for the statistical analysis                          |
| <b>Service</b>                                                                              |                                                               |                                                            |
| Primers Synthesis                                                                           | Integrated DNA Technologies, Inc., Singapore                  | Used to synthesis designed primers for PCR                 |
| Sanger Sequencing                                                                           | Apical Scientific Sdn. Bhd., Malaysia                         | Used to determine the nucleotide sequence of DNA           |
| Matrix Assisted Laser Desorption Ionization-time of Flight Mass Spectrometry (MALDI-TOF MS) | Medical Biotechnology Laboratory, Universiti Malaya, Malaysia | Used for protein identification                            |
| <b>Others</b>                                                                               |                                                               |                                                            |
| 96-well Cell Culture Plate                                                                  | Biologix, Germany                                             | Cat. No. 07-6096                                           |
| Centrifuge                                                                                  | Eppendorf, Germany                                            | Model 5430r                                                |
| Glass slide                                                                                 | Sail brand, China                                             | Cat. No. 7107                                              |
| Immun-Blot PVDF Membrane                                                                    | Bio-Rad, USA                                                  | Cat. No. 1620177                                           |
| Minisart® Syringe Filter, Polyethersulfone (PES), Pore Size 0.22 µm                         | Sartorius Minisart®, Sigma-Aldrich                            | Cat. No. 16532                                             |
| Polypropylene Columns                                                                       | Qiagen, Hilden, Germany                                       | Cat. No. 34964                                             |
| Sonic Dismembrator                                                                          | Fisher Scientific, USA                                        | Model 120                                                  |
| Tissue Culture Flasks 25                                                                    | TPP Zellkultur und Labortechnologie, Switzerland              | Cat. No. 90025                                             |
| Tissue Culture Flasks 75                                                                    | TPP Zellkultur und Labortechnologie, Switzerland              | Cat. No. 90075                                             |
| VWR® Vacuum Filtration System, 500 mL, 0.2 µm PES membrane                                  | VWR, USA                                                      | Cat. No. 514-0332                                          |

**Table S2.** Antibodies concentration and purity measurement.

| Sample ID          | Protein Concentration | Unit  | 260/280 | Sample Type |
|--------------------|-----------------------|-------|---------|-------------|
| Anti-PkAMA-1-DII-P | 3.585                 | mg/ml | 0.62    | IgG         |
| Anti-PkAMA-1-DII-B | 3.507                 | mg/ml | 0.62    | IgG         |

**Table S3.** Parasitemia obtained from all experiment groups and the negative controls (antibody-free).

(a) First biological replicate of the merozoite invasion assay

| Parasitemia<br>Negative control: 2.63  |                    |                    |              |
|----------------------------------------|--------------------|--------------------|--------------|
| Antibodies<br>concentration<br>(mg/ml) | Anti-PkAMA-1-DII-P | Anti-PkAMA-1-DII-B | Empty vector |
| 3                                      | 1.42               | 1.57               | 2.58         |
| 1.5                                    | 1.64               | 1.84               | 2.58         |
| 0.75                                   | 1.91               | 2.04               | 2.59         |
| 0.375                                  | 2.28               | 2.16               | 2.61         |
| 0.188                                  | 2.37               | 2.34               | 2.59         |
| 0.09                                   | 2.40               | 2.43               | 2.60         |
| 0.046                                  | 2.52               | 2.54               | 2.59         |
| 0.02                                   | 2.52               | 2.63               | 2.62         |

(b) Second biological replicate of the merozoite invasion assay

| Parasitemia<br>Negative control: 2.76  |                    |                    |              |
|----------------------------------------|--------------------|--------------------|--------------|
| Antibodies<br>concentration<br>(mg/ml) | Anti-PkAMA-1-DII-P | Anti-PkAMA-1-DII-B | Empty vector |
| 3                                      | 1.45               | 1.55               | 2.67         |
| 1.5                                    | 1.54               | 1.66               | 2.69         |
| 0.75                                   | 1.58               | 1.79               | 2.69         |
| 0.375                                  | 1.73               | 1.87               | 2.51         |
| 0.188                                  | 1.97               | 2.12               | 2.76         |
| 0.09                                   | 2.25               | 2.31               | 2.76         |
| 0.046                                  | 2.36               | 2.45               | 2.77         |
| 0.02                                   | 2.53               | 2.58               | 2.76         |

(c) Third biological replicate of the merozoite invasion assay

| Parasitemia<br>Negative control: 2.69  |                    |                    |              |
|----------------------------------------|--------------------|--------------------|--------------|
| Antibodies<br>concentration<br>(mg/ml) | Anti-PkAMA-1-DII-P | Anti-PkAMA-1-DII-B | Empty vector |
| 3                                      | 1.32               | 1.72               | 2.64         |
| 1.5                                    | 1.47               | 1.88               | 2.64         |
| 0.75                                   | 1.75               | 2.12               | 2.66         |
| 0.375                                  | 1.85               | 2.19               | 2.68         |
| 0.188                                  | 2.05               | 2.38               | 2.66         |
| 0.09                                   | 2.33               | 2.48               | 2.71         |
| 0.046                                  | 2.43               | 2.61               | 2.71         |
| 0.02                                   | 2.66               | 2.68               | 2.71         |

(d) Forth biological replicate of the merozoite invasion assay

| Parasitemia<br>Negative control: 2.70  |                    |                    |              |
|----------------------------------------|--------------------|--------------------|--------------|
| Antibodies<br>concentration<br>(mg/ml) | Anti-PkAMA-1-DII-P | Anti-PkAMA-1-DII-B | Empty vector |
| 3                                      | 1.42               | 1.63               | 2.69         |
| 1.5                                    | 1.83               | 1.88               | 2.70         |
| 0.75                                   | 1.95               | 2.00               | 2.71         |
| 0.375                                  | 2.06               | 2.11               | 2.71         |
| 0.188                                  | 2.16               | 2.18               | 2.74         |
| 0.09                                   | 2.26               | 2.30               | 2.70         |
| 0.046                                  | 2.37               | 2.52               | 2.71         |
| 0.02                                   | 2.46               | 2.58               | 2.75         |

(e) Fifth biological replicate of the merozoite invasion assay

| Parasitemia<br>Negative control: 4.20  |                    |                    |              |
|----------------------------------------|--------------------|--------------------|--------------|
| Antibodies<br>concentration<br>(mg/ml) | Anti-PkAMA-1-DII-P | Anti-PkAMA-1-DII-P | Empty vector |
| 3                                      | 2.42               | 2.63               | 4.17         |
| 1.5                                    | 2.56               | 2.80               | 4.18         |
| 0.75                                   | 2.82               | 3.10               | 4.20         |

|       |      |      |      |
|-------|------|------|------|
| 0.375 | 2.98 | 3.26 | 4.24 |
| 0.188 | 3.15 | 3.43 | 4.24 |
| 0.09  | 3.70 | 3.79 | 4.25 |
| 0.046 | 3.89 | 3.99 | 4.24 |
| 0.02  | 4.02 | 4.15 | 4.23 |

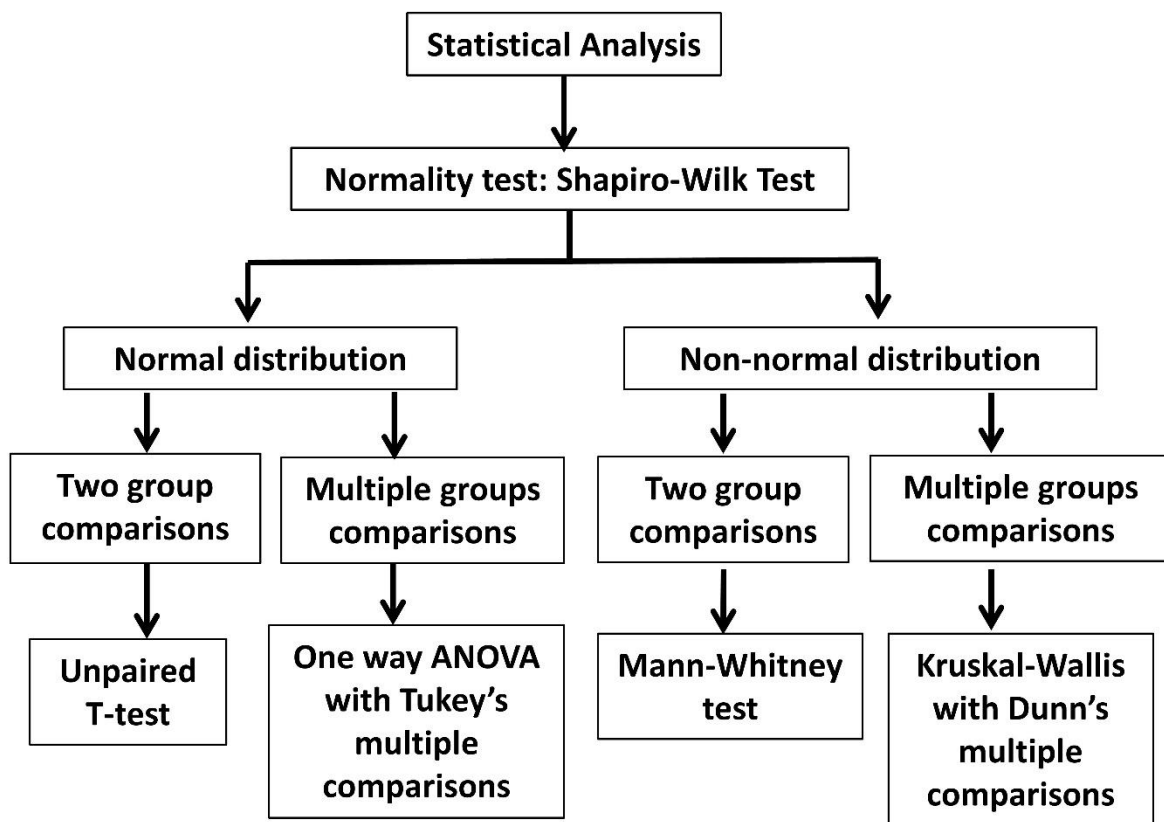

**Figure S1.** Schematic diagram of statistical analysis.

**A**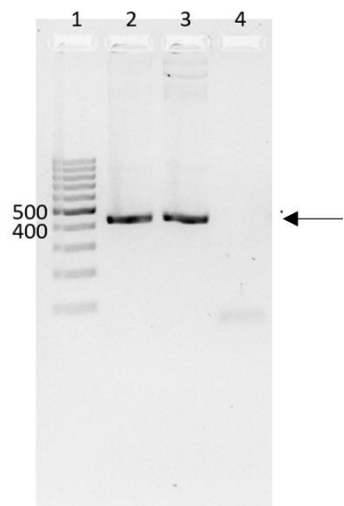**B**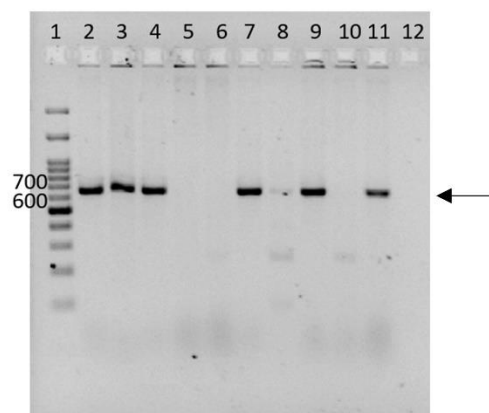**C**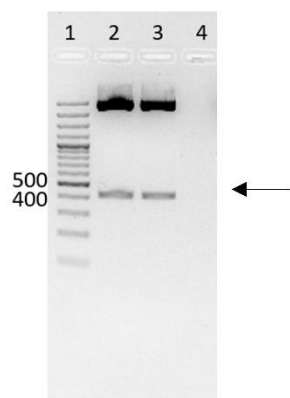**D**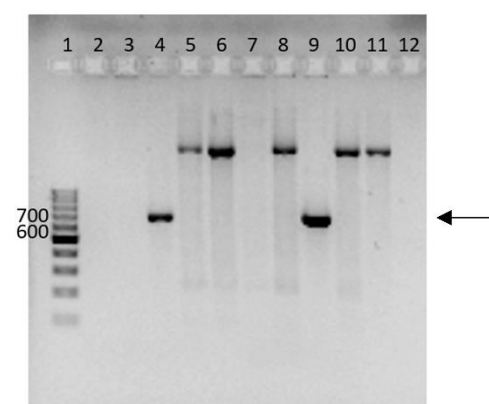**E**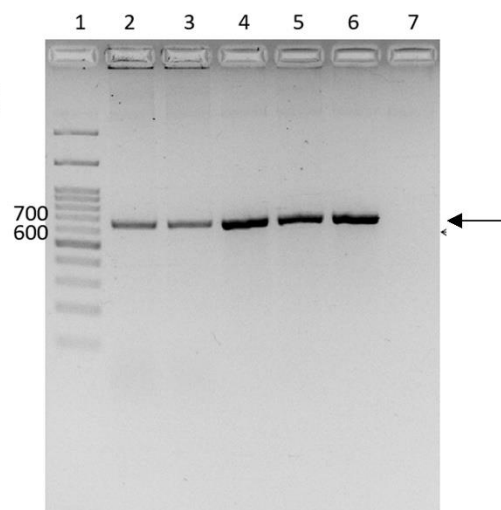

**Figure S2.** PCR, colony PCR and directional PCR of *PkAMA-1-DII*. **(A)** Visualisation of the PCR for *PkAMA-1-DII-P* and *PkAMA-1-DII-B* via agarose gel electrophoresis. Lane 1: 1000 bp of DNA ladder; lane 2: *PkAMA-1-DII-P*; lane 3: *PkAMA-1-DII-B*; lane 4: negative control. **(B)** Visualisation of the colony PCR for the positive selection of *PkAMA-1-DII-P* and *PkAMA-1-DII-B* with pGEM-T® TA cloning vector in TOP10F' *E. coli* cells via agarose gel electrophoresis. Lane 1: 1000 bp of DNA ladder; lane 2-6: *PkAMA-1-DII-P*; lane 7-11: *PkAMA-1-DII-B*; lane 12: negative control. **(C)** Visualisation of the restriction enzyme digestion of *PkAMA-1-DII-P* and *PkAMA-1-DII-B* in pGEM-T® TA cloning vector via agarose gel electrophoresis. Lane 1: 1000+ bp of DNA ladder; lane 2: *PkAMA-1-DII-P*; lane 3: *PkAMA-1-DII-B*; lane 4: negative control. **(D)** Visualisation of the directional PCR for the positive selection of *PkAMA-1-DII-P* and *PkAMA-1-DII-B* with T7 promoter-based pET-30a(+) protein expression vector in TOP10F' *E. coli* cells via agarose gel electrophoresis. Lane 1: 1000 bp of DNA ladder; lane 2-6: *PkAMA-1-DII-P*; lane 7-11: *PkAMA-1-DII-B*; lane 12: negative control. **(E)** Visualisation of the directional PCR for the positive selection of *PkAMA-1-DII-P* and *PkAMA-1-DII-B* with T7 promoter-based pET-30a(+) protein expression vector in *E. coli* protein expression host T7 Express *lysY/T<sup>q</sup>* via agarose gel electrophoresis. Lane 1: 1000 bp of DNA ladder; lane 2-3: *PkAMA-1-DII-P*; lane 4-6: *PkAMA-1-DII-B*; lane 7: negative control. The *PkAMA-1-DII-B* and *PkAMA-1-DII-P* with the length of 435 bp [in **(A)** and **(C)** (PCR using *PkAMA-1-DII* primers)] and 675 bp [in **(B)**, **(D)** and **(E)** (PCR using vector primers)] were detected in agarose gel (arrows).

## **{*MATRIX*}** Mascot Search Results

```

User      :
Email     :
Search title : MALDI\W2021_001\WSMS_9\B4
Database   : p.knowlesi_jan2021_knowlesi
Timestamp  : 25 Jan 2021 at 01:34:36 GMT
Protein hits : AQA089Q772|AQA089Q772 PLAKN Apical membrane antigen-1 (Fragment) OS=Plasmodium knowlesi OX=5850 GN=ama-1 PE=3 SV=1
               ADA679LIQ7|ADA679LIQ7 PLAKH 6-cysteine protein OS=Plasmodium knowlesi (strain H) OX=5851 GN=PKNH_0303400 PE=4 SV=1
               ADA1Y3DJEG|ADA1Y3DJEG PLAKN Putative Calcium/calmodulin-dependent protein kinase OS=Plasmodium knowlesi OX=5850 GN=PKNOH_S120120900 PE=4 SV=1
               ADA1Y3DLF5|ADA1Y3DLF5 PLAKN Uncharacterized protein OS=Plasmodium knowlesi OX=5850 GN=PKNOH_S120130800 PE=4 SV=1
               ADA1Y3DRLO|ADA1Y3DRLO PLAKN Putative Kinesin-4 OS=Plasmodium knowlesi OX=5850 GN=PKNOH_S100037600 PE=3 SV=1
               ADA5K1UGJ0|ADA5K1UGJ0 PLAKH Uncharacterized protein OS=Plasmodium knowlesi (strain H) OX=5851 GN=PKNAL_C2_1257600 PE=4 SV=1
               ADA1Y3DTA8|ADA1Y3DTA8 PLAKN Uncharacterized protein OS=Plasmodium knowlesi OX=5850 GN=PKNOH_S06416200 PE=4 SV=1
               ADA1A7W1V2|ADA1A7W1V2 PLAKH Ubiquitin carboxyl-terminal hydrolase 1, putative OS=Plasmodium knowlesi (strain H) OX=5851 GN=PKNAL_H1_0209200 PE=4 SV=1
               ADA1Y3DTE4|ADA1Y3DTE4 PLAKN Putative Asparagine-rich antigen OS=Plasmodium knowlesi OX=5850 GN=PKNOH_S09517100 PE=4 SV=1
               ADA1Y3DV62|ADA1Y3DV62 PLAKN Putative Lysine decarboxylase OS=Plasmodium knowlesi OX=5850 GN=PKNOH_S02296100 PE=4 SV=1

```

### Probability Based Mowse Score

Ions score is  $-10 \cdot \log(P)$ , where P is the probability that the observed match is a random event.  
 Individual ions scores > 28 indicate identity or extensive homology ( $p < 0.05$ ).  
 Protein scores are derived from ions scores as a non-probabilistic basis for ranking protein hits.

### Index

| Accession                                       | Mass  | Score | Description                                                                                       |
|-------------------------------------------------|-------|-------|---------------------------------------------------------------------------------------------------|
| 1. <a href="#">P21303 PK66_PLAKU</a>            | 65722 | 562   | Merozoite receptor PK66 OS=Plasmodium knowlesi (strain nuri) OX=5852 GN=PK66 PE=2 SV=2            |
| 2. <a href="#">ADA0F6QH00 ADA0F6QH00 PLAKN</a>  | 65627 | 561   | Apical membrane antigen 1 OS=Plasmodium knowlesi OX=5850 GN=AMAL PE=3 SV=1                        |
| 3. <a href="#">ADA089Q790 ADA089Q790 PLAKN</a>  | 64644 | 555   | Apical membrane antigen-1 (Fragment) OS=Plasmodium knowlesi OX=5850 GN=ama-1 PE=3 SV=1            |
| 4. <a href="#">ADA0K0PKH1 ADA0K0PKH1 PLAKN</a>  | 65746 | 554   | Apical membrane antigen OS=Plasmodium knowlesi OX=5850 GN=ama1 PE=3 SV=1                          |
| 5. <a href="#">Q964I3 Q964I3 PLAKN</a>          | 65736 | 553   | Apical membrane antigen 1 OS=Plasmodium knowlesi OX=5850 GN=AMAL PE=3 SV=1                        |
| 6. <a href="#">ADA5K1VGF3 ADA5K1VGF3 PLAKH</a>  | 65736 | 553   | Apical membrane antigen 1 OS=Plasmodium knowlesi (strain H) OX=5851 GN=PKNAL_C2_0931500 PE=3 SV=1 |
| 7. <a href="#">ADA384KGX8 ADA384KGX8 PLAKH</a>  | 65736 | 553   | Apical membrane antigen 1 OS=Plasmodium knowlesi (strain H) OX=5851 GN=PKNH_0931500 PE=3 SV=1     |
| 8. <a href="#">ADA0F6T3S0 ADA0F6T3S0 PLAKN</a>  | 65706 | 553   | Apical membrane antigen 1 OS=Plasmodium knowlesi OX=5850 GN=AMAL PE=3 SV=1                        |
| 9. <a href="#">ADA0F6T319 ADA0F6T319 PLAKN</a>  | 65664 | 553   | Apical membrane antigen 1 OS=Plasmodium knowlesi OX=5850 GN=AMAL PE=3 SV=1                        |
| 10. <a href="#">ADA0F6QJR3 ADA0F6QJR3 PLAKN</a> | 65692 | 553   | Apical membrane antigen 1 OS=Plasmodium knowlesi OX=5850 GN=AMAL PE=3 SV=1                        |

**Figure S3.** The MALDI-TOF analysis revealed PkAMA-1-DII-P protein identity as *P. knowlesi* apical membrane antigen 1.



# {MATRIX} Mascot Search Results

User :  
Email :  
Search title : MALDI\MS2021\_001\MSMS\_9\B3  
Database : p\_Knowledge\_jan2021\_Knowledge  
Timestamp : 25 Jan 2021 at 01:34:34 GMT  
Protein hits : A0A089Q871|A0A089Q871\_PLAKN Apical membrane antigen-1 (Fragment) OS=Plasmodium knowlesi OX=5850 GN=ama-1 PE=3 SV=1  
A0A679LIQ7|A0A679LIQ7\_PLAKH 6-cysteine protein OS=Plasmodium knowlesi (strain H) OX=5851 GN=PKNH\_0303400 PE=4 SV=1  
A0A1Y3DM07|A0A1Y3DM07\_PLAKN Uncharacterized protein OS=Plasmodium knowlesi OX=5850 GN=PKNOH\_507466800 PE=4 SV=1  
A0A1Y3DN70|A0A1Y3DN70\_PLAKN Putative E2F protein OS=Plasmodium knowlesi OX=5850 GN=PKNOH\_S120127000 PE=3 SV=1  
A0A1Y3DNW0|A0A1Y3DNW0\_PLAKN Putative ATP-dependent RNA helicase DX6 OS=Plasmodium knowlesi OX=5850 GN=DOZI PE=3 SV=1  
A0A1Y3DJZ4|A0A1Y3DJZ4\_PLAKN Bromo domain-containing protein OS=Plasmodium knowlesi OX=5850 GN=PKNOH\_S140271700 PE=4 SV=1  
A0A1Y3DMN8|A0A1Y3DMN8\_PLAKN PRESAN domain-containing protein OS=Plasmodium knowlesi OX=5850 GN=PKNOH\_S05370500 PE=4 SV=1  
A0A193QXI4|A0A193QXI4\_PLAKH Pre-mRNA-splicing factor SYFI, putative OS=Plasmodium knowlesi (strain H) OX=5851 GN=PKNAL\_C2\_1455600 PE=4 SV=1  
A0A193QOB3|A0A193QOB3\_PLAKH SICAVAR, type I OS=Plasmodium knowlesi (strain H) OX=5851 GN=PKNAL\_C2\_0940500 PE=4 SV=1  
A0A1Y3DU76|A0A1Y3DU76\_PLAKN Uncharacterized protein OS=Plasmodium knowlesi OX=5850 GN=PKNOH\_503039305 PE=4 SV=1

## Probability Based Mowse Score

Ions score is  $-10 \cdot \log(P)$ , where P is the probability that the observed match is a random event.  
Individual ions scores > 29 indicate identity or extensive homology ( $p < 0.05$ ).  
Protein scores are derived from ions scores as a non-probabilistic basis for ranking protein hits.

## Index

| Accession                       | Mass  | Score | Description                                                                            |
|---------------------------------|-------|-------|----------------------------------------------------------------------------------------|
| 1. A0A089RQG1 A0A089RQG1_PLAKN  | 64544 | 335   | Apical membrane antigen-1 (Fragment) OS=Plasmodium knowlesi OX=5850 GN=ama-1 PE=3 SV=1 |
| 2. A0A089Q881 A0A089Q881_PLAKN  | 64568 | 335   | Apical membrane antigen-1 (Fragment) OS=Plasmodium knowlesi OX=5850 GN=ama-1 PE=3 SV=1 |
| 3. A0A089QB03 A0A089QB03_PLAKN  | 64592 | 335   | Apical membrane antigen-1 (Fragment) OS=Plasmodium knowlesi OX=5850 GN=ama-1 PE=3 SV=1 |
| 4. A0A0F6QHW5 A0A0F6QHW5_PLAKN  | 65648 | 334   | Apical membrane antigen 1 OS=Plasmodium knowlesi OX=5850 GN=AMA1 PE=3 SV=1             |
| 5. A0A0F6T3P8 A0A0F6T3P8_PLAKN  | 65661 | 334   | Apical membrane antigen 1 OS=Plasmodium knowlesi OX=5850 GN=AMA1 PE=3 SV=1             |
| 6. A0A0F6QHY3 A0A0F6QHY3_PLAKN  | 65648 | 334   | Apical membrane antigen 1 OS=Plasmodium knowlesi OX=5850 GN=AMA1 PE=3 SV=1             |
| 7. A0A0F6QIA5 A0A0F6QIA5_PLAKN  | 65661 | 334   | Apical membrane antigen 1 OS=Plasmodium knowlesi OX=5850 GN=AMA1 PE=3 SV=1             |
| 8. A0A0F6QI94 A0A0F6QI94_PLAKN  | 65614 | 334   | Apical membrane antigen 1 OS=Plasmodium knowlesi OX=5850 GN=AMA1 PE=3 SV=1             |
| 9. A0A089Q871 A0A089Q871_PLAKN  | 64582 | 334   | Apical membrane antigen-1 (Fragment) OS=Plasmodium knowlesi OX=5850 GN=ama-1 PE=3 SV=1 |
| 10. A0A089QDF8 A0A089QDF8_PLAKN | 64559 | 334   | Apical membrane antigen-1 (Fragment) OS=Plasmodium knowlesi OX=5850 GN=ama-1 PE=3 SV=1 |

**Figure S4.** The MALDI-TOF analysis revealed PkAMA-1-DII-B protein identity as *P. knowlesi* apical membrane antigen 1.

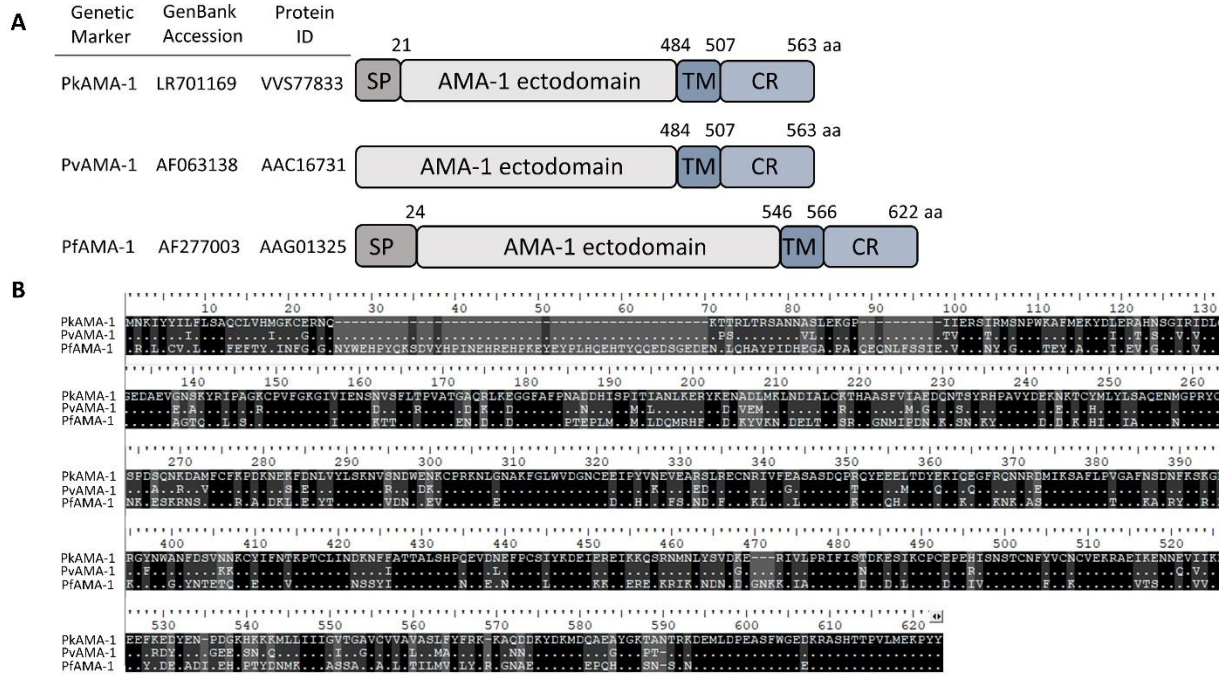

**Figure S5.** Schematic structures and sequences of *P. knowlesi* AMA-1, *P. vivax* AMA-1 and *P. falciparum* AMA-1. (A) Schematic structures of *P. knowlesi* AMA-1 (PkAMA-1), *P. vivax* AMA-1 (PvAMA-1) and *P. falciparum* AMA-1 (PfAMA-1), which consists of signal peptide (SP), ectodomain, transmembrane region (TM) and cytoplasmic region (CR) (analysis using the protein signature databases, InterProScan). (B) Alignment of the amino acid sequences of PkAMA-1, PvAMA-1 and PfAMA-1. The amino acids that are conserved across the three recruited species are highlighted in black, whereas the polymorphic amino acids are highlighted in grey.
